# Supplementary material for: Size-dependent melting thermodynamics of nanorods in theory and experiment
Source: Royal Society of Chemistry journal article supplement (doi:10.1039/c9cp04957f), 2019-01-01
Supplement: c9cp04957f1.pdf [file c9cp04957f1.pdf]

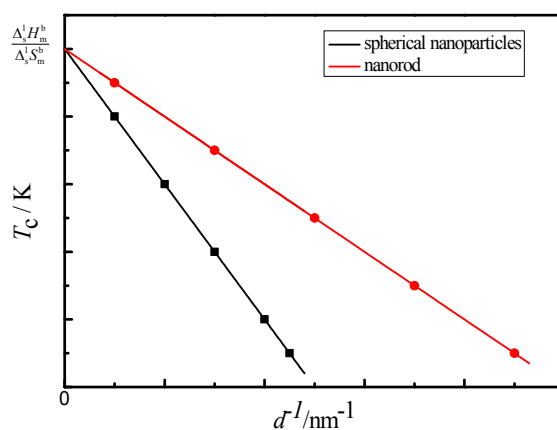

S1 The comparison of melting temperature of nanorods with that of spherical nanoparticles

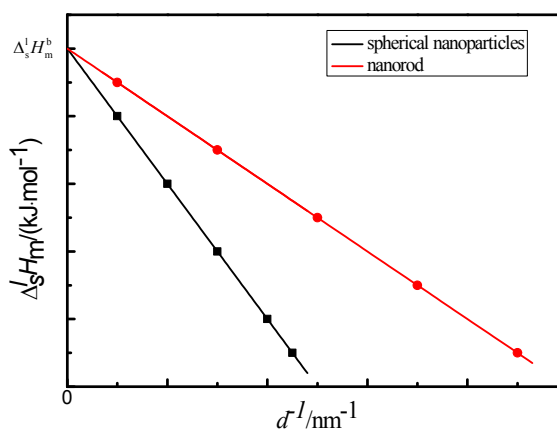

S2 The comparison of melting enthalpy of nanorods with that of spherical nanoparticles

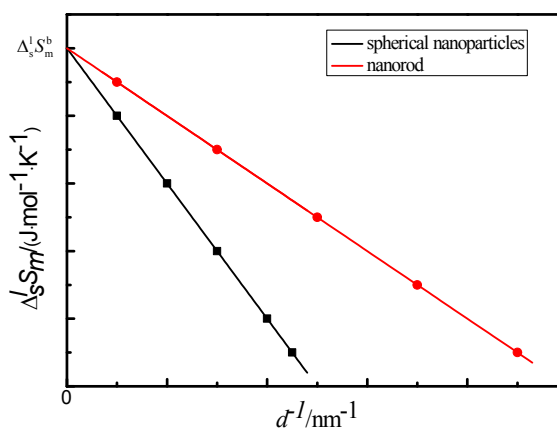

S3 The comparison of melting entropy of nanorods with that of spherical nanoparticles

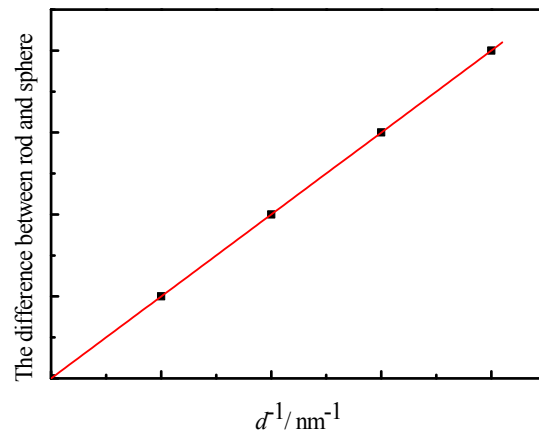

S4 The differences in melting thermodynamic properties between nanorods and spherical nanoparticles
